# INDEX OF SUBJECTS • VOLUME 19

Subject entries for all material in the JOURNAL (except *Briefs from the Literature*) appear in this index. The page number in bold face indicates an original article, and the name of the author, in brackets, follows the subject entry. Entries from the JOURNAL departments are followed by the department in which the subject matter appears, i.e., Editorial, Current Comment and Abstract.

This is a subject index and one should, therefore, look for the subject word except for Book Notices and Book Reviews which are listed only under these headings. Matter pertaining to societies is indexed under the individual society name. For index to issues and authors see page 827.

- Absorbents:** see also under Soda Lime  
carbon dioxide absorbers [current comment], 414  
carbon dioxide, voids, pores and air space [Brown], 1  
channeling and overpacking of absorbers [current comment], 403
- Adrenalectomy**  
bilateral, anesthesia for [Bellville & others], 217
- Agents:** see under Drugs; Anesthesia  
American Society of Anesthesiologists, Inc.  
annual meeting notice, 177, 423, 449, 687, 751  
democracy [editorial], 798  
Ninth Annual Refresher Course Program, 585; canceled, 751  
preliminary program, annual meeting, 709; canceled, 751
- Analeptics:** see also Methylthylglutarimide; Methylphenidate  
newer, comparison with pentylene-tetrazole, nikethamide and picrotoxin [abstract], 115
- Analgesia:** see Anesthesia; Pain, relief of
- Anesthesia:** see also under names of specific agents and procedures  
agents, effect on evoked central nervous system responses [Davis & others], 441  
cyclopropane, epinephrine and norepinephrine in initiation of ventricular arrhythmias by carbon dioxide inhalation [Price & others], 619  
effect of Fluothane [Burnap & others], 307  
epidural, blunt-tip needle for [current comment], 556  
ether, concentrations, flammability and blood levels [Ebersole & Artusio], 607  
Fluothane, properties [Krantz & others], 38  
Fluothane, respiratory studies during [Devine & others], 11  
for bilateral adrenalectomy [Bellville & others], 217  
in dogs, compatibility of synthetic oxytocin with [Feldman & others], 787  
in radiation sickness [translation from Russian], 792  
monitoring, instrumentation and [editorial], 676  
nitrous oxide induction, arterial oxygen saturation and respiratory minute volume during [abstract], 94  
obstetrical, lumbar sympathetic nerve block [abstract], 98  
pediatric, hypno-induction techniques in [current comment], 279  
records [current comment], 410  
records, Illinois E-Z Sort card [Sadove & Levin], 178  
spinal, case report [current comment], 682  
spinal, continuous, in treatment of acute pulmonary edema [current comment], 561  
spinal, heat sterilization of ampuls [Gerlich & others], 394  
spinal, with hyperbaric tetracaine, area of differential block in [Greene], 45  
teaching [Mushin], 131  
topical tracheal with lidocaine [current comment], 803  
traditional signs and stages, electroencephalographic and clinical study [Galla & others], 328  
vaporizers: see under Apparatus  
volatile, action on muscle preparations [Sabawala & Dillon], 587  
volatile agents and muscle relaxants, effect on evoked central nervous system responses in cat [abstract], 98  
volatile drugs, determining vapor concentrations of [Fabian & others], 51
- Anesthetics:** see also names of specific drugs and agents  
comparison of, on incidence of ventricular fibrillation in experimental hypothermic ventriculotomy [Anlyan & others], 213
- Antagonism**  
of barbiturate and meperidine by Ritalin [abstract], 101
- Apparatus:** see also under names of specific equipment

- adaptor for connecting tracheostomy tubes [current comment], 803
- anesthetic vaporizers, design and function [Morris & Feldman], 642
- audiovisual monitoring of unborn infant [abstract], 104
- carbon dioxide analyzer (new and inexpensive) [abstract], 97
- cardiac pacemaker [current comment], 563
- chest guard [current comment], 289
- circle absorbers design [abstract], 99
- combination resuscitator and aspirator [current comment], 406
- Copper Kettle [current comment], 559
- Copper Kettle, vaporization of halothane and ether [Feldman & Morris], 650
- device for mounting cuffs [current comment], 559
- needle adaptors for ECG monitoring machines [current comment], 806
- ear oximeter as circulatory monitor [Schotz & others], 386
- gas analyzer for rapid estimation of cyclopropane [Linde & Price], 757
- inflatable plastic tub for hypothermia [current comment], 287
- inhalers for trichloroethylene, chloroform and Fluothane [abstract], 109; [Ngai & others], 488
- intravenous sets [current comment], 801
- low flow pump oxygenator during cardiopulmonary bypass, biochemical changes induced by [abstract], 107
- modification of tracheostomy tube [current comment], 406
- modified Ayre's T-piece, positive-negative pressure ventilation with [Eger & Hamilton], 611
- monitoring, instrumentation and anesthesia [editorial], 676
- pillow for anesthesia [current comment], 681
- three-way stopcock [current comment], 680
- tracheal sucker [current comment], 290
- vaporizers, Fluotec performance [current comment], 681
- ventilating bronchoscope [current comment], 406
- volume displacement ventilator, ventilation and circulation during surgery [abstract], 100
- Arfonad: see Trimethaphan Camphorsulfonate Arm
- upper, regional block of great nerves of [current comment], 281
- Arrhythmias: see also Ventricular Fibrillation
- cardiac, produced by mechanical stimulation during hypothermia [abstract], 113
- cyclopropane-epinephrine (in dogs), suppression by phenothiazine derivatives [Winbury & others], 743
- ventricular, epinephrine and norepinephrine in initiation of, during cyclopropane anesthesia [Price & others], 619
- Aspiration
- combination resuscitator and aspirator [current comment], 408
- Axillary Brachial Plexus
- block [current comment], 683
- Barbiturates: see Thiopental Sodium, Pentobarbital Sodium
- antagonist—Ritalin [abstract], 101
- intravenous, potency [abstract], 110
- Block: see under Anesthesia; Muscles; Nerves
- Blood
- arterial, ether levels in ether analgesia, concentrations and flammability [Ebersole & Artusio], 607
- arterial oxygen saturation and respiratory minute volume, during induction with nitrous oxide [abstract], 94
- biochemical changes from low flow pump oxygenator during cardio-pulmonary bypass [abstract], 107
- circulation during surgery using volume displacement ventilator [abstract], 100
- circulation, ear oximeter as monitor [Schotz & others], 386
- circulatory effects of Fluothane [Burnap & others], 307
- clotting and cardiovascular disturbances during massive replacement [Howland], 140
- estimation of ethylvinyl ether [Linde], 254
- fetal cord, measurement of concentration of promethazine in [abstract], 93
- hemodynamic effects of chlorpromazine, including cardiac work and coronary blood flow [Maxwell & others], 64
- replacement (massive), cardiovascular and clotting disturbances during [Howland], 140
- venous, measurement of concentration of promethazine in [abstract], 93
- volumes in men and women over sixty years of age as determined by modified Cr<sup>41</sup> method [Smith], 752
- Blood Pressure
- low, Arfonad induced, respiratory studies with [abstract], 106
- low, and intravenous administration of  $\alpha$ -tubocurarine [current comment], 404
- Book Notices
- Accepted Dental Remedies—1958: American Dental Association, 423
- American Medical Association Scientific Exhibits 1957: American Medical Association, 810
- The Author-Publisher-Printer Complex. Third Edition: Robert S. Gill, 810
- How to write Scientific and Technical Papers: Sam F. Trelease, 423

- Leifaden der örlichen Betäubung: Ernst Seifert, 423
- Stedman's Medical Dictionary: Norman Burke Taylor and Lt. Col. Allen Ellsworth Taylor, Editors, 423
- BOOK REVIEWS**
- Anatomy**
- Essentials of Human Anatomy: Russell T. Woodbine, 810
- Anesthesia**
- Acta anaesthesiologica scandinavica*: Iusu Societatis anaesthesiologicae Scandinavicae, 422
- Anesthesia: A Manual for Students and Physicians. Fifth Edition: Stuart C. Cullen, 416
- Anesthesia and Otolaryngology: Donald F. Proctor, 417
- British Medical Bulletin. Volume 14, No. 1, 689
- First Edition of Selected Scientific Papers and Addresses of Ralph Milton Waters, M.D.-Richard Foregger and the Foregger Company, Inc., 119
- Introduction to Anesthesia: The Principles of Safe Practice: Robert D. Dripps, James E. Eckenhoff and Leroy D. Vandam, 294
- The Japanese Journal of Anesthesiology*, 569
- Lumbar Puncture and Spinal Analgesia, Second Edition: Sir Robert Macintosh, 416
- Monograph on Nitrous Oxide and Its Uses in Surgery: Micyslaw Justyna, 421
- Nitrous Oxide-Oxygen Analgesia in Dental Practice: Paul Vonow, 420
- Recent Advances in Anaesthesia and Analgesia. Including Oxygen Therapy. Eighth Edition: C. Langton Hewer and J. Alfred Lee, 118
- Spinal Anesthesia: John B. Dillon, 568
- Veterinary Anaesthesia: John G. Wright, 569
- Chest Diseases**
- Bronchopulmonary Diseases. Basic Aspects, Diagnosis and Treatment: Emil A. Naclerio, Editor, 117
- Dentistry**
- Accepted Dental Remedies—1957: American Dental Association, 419
- Enzymology**
- Clinical Enzymology: Gustav J. Martin, 808
- Hospitals**
- Hospital Accreditation References: American Hospital Association, 568
- Hypnosis**
- Hypnography: A Study in the Therapeutic Use of Hypnotic Painting: Ainslie Meares, 420
- Obstetrics**
- The Premature Baby. Fourth Edition: V. Mary Crosse, 118
- Pharmacology and Therapeutics**
- An Introduction to Pharmacology and Therapeutics: J. A. Gunn and J. D. P. Graham, 808
- Pharmacology in Medicine: Victor A. Drill, Editor, 807
- Pharmacologic Principles of Medical Practice. Fourth Edition: John C. Krantz and C. Jelleff Carr, 417
- A Textbook of Pharmacognosy. Seventh Edition: George Edward Trease, 418
- Physiology**
- Bases Physio-Biologiques et Principes Généraux de Réanimation: H. Laborit and others, 807
- Blood Volume Determinations with Radioactive Isotopes and Index of Cardiac Clearance: S. N. Albert and others, 809
- Klinische Calorimetrie und Thermometrie: Helmut P. Kuemmerle, 808
- The Physiology of Induced Hypothermia. Proceedings of a Symposium: Robert D. Dripps, 118
- The Respiratory Muscles and the Mechanics of Breathing: E. J. Moran Campbell, 568
- Verhandlungen der Deutschen Gesellschaft für Kreislaufforschung: Rudolf Thauer, 419
- Radiation**
- A Practical Manual on the Medical and Dental Use of X-Rays with Control of Radiation Hazards: American College of Radiology, 809
- Surgery**
- Cardiovascular Collapse in the Operating Room: Herbert E. Natof and Max S. Sadove, 688
- The Century of the Surgeon: Jürgen Thorwald, 418
- Nursing Care of the Surgical Patient. Sixth Edition: John Petit West, Manelva Wylie Keller and Elizabeth H. Harmon, 421
- Straight to the Heart. A Personal Account of Thoughts and Feelings While Undergoing Heart Surgery: George Lawton, 419
- Tracheotomy: A Clinical and Experimental Study: Thomas G. Nelson, 688
- Toxicology**
- Handbook of Toxicology. Volume 2. Antibiotics: William S. Spector, Editor, 422
- Brain**
- cranial arteriography, use of intracarotid arterial procaine [abstract], 96

- electroencephalographic and clinical study of the traditional signs and stages of anesthesia [Galla & others], 328
- Bronchoscopy  
ventilating bronchoscope [current comment], 406
- Caffeine  
effects on respiratory center [abstract], 95
- Canisters  
with shunt valve arm [current comment], 565
- Carbon Dioxide  
absorbents, voids, pores and air space [Brown], 1  
absorbers [current comment], 414  
absorbers, channeling and overpacking [current comment], 403  
absorption, circle versus the to-and-fro [Ten Pas & others], 231  
absorption during anesthesia, factors influencing [Nealon & others], 75  
analyzer (new and inexpensive) [abstract], 97  
effect of noscapine and codeine on respiratory response to [Bellville & others], 545  
elevated end-expiratory tensions, cardiac rate and rhythm during steady levels of cyclopropane anesthesia at [Lurie & others], 457  
hypercapnia, effect of narcotics, thiopental and nitrous oxide upon respiration and respiratory response to [Eckenhoff & Helrich], 240  
infrared analysis of, collision broadening effect of nitrous oxide upon [Bergman & others], 19  
inhalation during cyclopropane anesthesia, epinephrine and norepinephrine in initiation of ventricular arrhythmias by [Price & others], 619  
retention during hypoventilation [Earle & others], 153  
transients during ether and cyclopropane anesthesia, respiratory responses to [Cobb & others], 359
- Cardiovascular System: See also under Blood; Heart  
cardio-respiratory effects and pharmacologic properties of hydroxydione [abstract], 108  
and clotting disturbances during massive blood replacement [Howland], 140  
effects of Fluothane [abstract], 106  
effects of Fluothane [Hall & Norris], 339  
properties of hydroxydione [Montmorency & others], 450
- Cerebrospinal Fluid  
measurement of concentration of promethazine in [abstract], 93
- Children: see also Anesthesia, pediatric;  
Infants; under names of specific diseases and procedures
- Chloroform  
inhalers for [abstract], 109; [Ngai & others], 488
- Chlorpromazine  
hemodynamic effects [Maxwell & others], 64
- Circulation: see Blood, circulation; under Cardiovascular System; Heart
- Codeine  
effect on respiratory response to carbon dioxide [Bellville & others], 545  
effects on respiratory center [abstract], 95
- Compliance: see under Respiration
- Copper Kettle: see under Apparatus
- Cordotomy  
versus chemical rhizotomy for intractable pain [abstract], 102
- Cuffs: see under Apparatus
- Cyclizine (Marezine)  
for postanesthetic nausea, retching and vomiting [Bonica & others], 532
- Cyclopropane  
anesthesia at normal and elevated end-expiratory carbon dioxide tensions, cardiac rate and rhythm during steady levels of [Lurie & others], 457  
anesthesia, epinephrine and norepinephrine in initiation of ventricular arrhythmias by carbon dioxide inhalation [Price & others], 619  
anesthesia, respiratory responses to carbon dioxide transients during [Cobb & others], 359  
-epinephrine arrhythmias in dogs by phenothiazine derivatives, suppression of [Winbury & others], 743  
gas analyzer for rapid estimation [Linde & Price], 757  
positive inotropic action of, on intercostal muscle *in vitro* and modification by *d*-tubocurarine [Sabawala & Dillon], 473  
thoracic compliance in anesthetized subject using [abstract], 116
- Demerol: see Meperidine
- Diethyl Ether  
effect on tissue distribution and metabolism of pentobarbital in rats [Backlund & Greene], 724
- Drugs  
anesthetic (inhalation), hepatotoxicity of [Jones & others], 715  
volatile anesthetic, determining vapor concentrations of [Fabian & others], 51
- Edema  
pulmonary (acute), continuous spinal anesthesia in treatment of [current comment], 561
- Education  
teaching of anesthesia [Mushin], 131

- Embolism**  
 air, prevention for intravenous sets [current comment], 801
- Endotracheal Tube**  
 occlusion with foreign body [current comment], 561
- Epidural Anesthesia: see Anesthesia, epidural**
- Epidural Space**  
 spread of radiopaque solutions in [Moore & others], 377
- Epinephrine**  
 administered during ether anesthesia, metabolic consequences of [abstract], 104  
 -cyclopropane arrhythmias in dogs by phenothiazine derivatives, suppression of [Winbury & others], 743  
 Fluothane sensitization of dog heart to [Hall & Norris], 631  
 in initiation of ventricular arrhythmias by carbon dioxide inhalation during cyclopropane anesthesia [Price & others], 619
- Esophagus**  
 rupture of varices [current comment], 291
- Ether: see also Diethyl Ether; Ethylvinyl Ether**  
 analgesia, concentrations, flammability and blood levels [Ebersole & Artusio], 607  
 anesthesia, metabolic consequences of epinephrine and insulin administered during [abstract], 104  
 anesthesia, respiratory responses to carbon dioxide transients during [Cobb & others], 359  
 vaporization of, in Copper Kettle [Feldman & Morris], 650
- Ether Peroxides**  
 formation and decomposition [Shukys & Neeley], 671
- Ethylene Oxide**  
 sterilization of ampuls with [Hallowell & others], 665
- Ethylvinyl Ether (Vinamir)**  
 estimation in blood [Linde], 254  
 thoracic compliance in anesthetized subject using [abstract], 116
- Eyes**  
 intraocular pressure, effect of succinylcholine on [abstract], 112  
 oculo-cardiac reflex in eye muscle surgery [Bosomworth & others], 7
- Face Mask**  
 for edentulous patients [current comment], 90
- Fire**  
 ether analgesia [Ebersole & Artusio], 607
- Fluothane (Halothane; 1,1,1-Trifluoro-2,2-Bromochloroethane)**  
 [current comment], 565  
 anesthesia, depression of myocardium and of total body oxygen consumption by [abstract], 113; [Severinghaus & Cullen], 165  
 anesthesia, respiratory studies during [Devine & others], 11  
 anesthetic, circulatory and respiratory effects of Fluothane [Burnap & others], 307  
 anesthetic properties [Krantz & others], 38  
 cardiovascular and respiratory effects [abstract], 106  
 case report [current comment], 90  
 clinical appraisal [abstract], 93  
 clinical experience [Stephen & others], 197  
 hepatic function following [abstract], 105  
 inhalers [abstract], 109; [Ngai & others], 488  
 laboratory observations [Stephen & others], 770  
 observations during experimental and clinical use [Virtue & others], 478  
 postoperative death after [current comment], 562  
 respiratory and cardiovascular effects of [Hall & Norris], 339  
 sensitization of dog heart to epinephrine [Hall & Norris], 631  
 vaporization of, in Copper Kettle [Feldman & Morris], 650  
 vaporizer, simple and accurate [current comment], 284
- Gases**  
 analyzer for rapid estimation of cyclopropane [Linde & Price], 757
- Halothane: see Fluothane**
- Heart**  
 arrhythmias produced by mechanical stimulation during hypothermia [abstract], 113  
 cardiac pacemaker [current comment], 563  
 cardio-pulmonary bypass, biochemical changes induced by low flow pump oxygenator during [abstract], 107  
 centrally induced irregularities, hypothermic potentiation of [Purpura & others], 27  
 (dog), Fluothane sensitization of, to epinephrine [Hall & Norris], 631  
 effect of preanesthetic medication on cardiovascular force [Malt], 353  
 electrocardiographic studies of tracheo-cardiac reflex during analgesia with nitrous oxide and relaxants [abstracts], 103  
 hemodynamic effects of chlorpromazine, including cardiac work and coronary blood flow [Maxwell & others], 64  
 oculo-cardiac reflex in eye muscle surgery [Bosomworth], 7  
 rate and rhythm during steady levels of cyclopropane anesthesia at normal and elevated end-expiratory carbon dioxide tensions [Lurie & others], 457  
 surgery, anesthetic problems in cardio-pulmonary bypass for [Keats & others], 501  
 surgery, comparison of anesthetics on incidence ventricular fibrillation in experi-

- mental hypothermic ventriculotomy [Anlyan & others], 213
- Hematocrit  
values in guinea pigs, effect of pentobarbital on [Tabari & Becker], 541
- Hemoglobin  
effect of pentobarbital on, in guinea pigs [Tabari & Becker], 541
- Hepatotoxicity  
of inhalation anesthetic drugs [Jones & others], 715
- Hydroxydione (21-Hydroxy-3,20-dione Sodium Succinate)  
cardiovascular, respiratory and pharmacologic properties of [Montmorency & others], 450  
pharmacologic properties of cardiovascular-respiratory effects of [abstract], 108
- Hyperaldosteronism  
(primary) anesthetic experience [Garlington & Bailey], 661
- Hypercapnia: see under Carbon Dioxide
- Hypnosis  
induction techniques in pediatric anesthesia [current comment], 279  
thiopental and methitural [Egbert & others], 656
- Hypotension: see Blood Pressure, low
- Hypothermia  
cardiac arrhythmias produced by mechanical stimulation during [abstract], 113  
comparison of anesthetics on incidence of ventricular fibrillation in experimental hypothermic ventriculotomy [Anlyan & others], 213  
inflatable plastic tub for hypothermia [current comment], 287  
potentiation of centrally induced cardiac irregularities [Purpura & others], 27
- Hypoventilation: see under Respiration
- Induction: see Anesthesia, induction
- Infant  
unborn, audiovisual monitoring of [abstract], 104
- Infrared Analysis  
of carbon dioxide during anesthesia, collision broadening effect of nitrous oxide upon [Bergman & others], 19
- Inhalation Anesthesia: see under Anesthesia
- Inhalers: see Apparatus, inhalers
- Insulin  
administered during ether anesthesia, metabolic consequences of [abstract], 104
- Lidocaine  
topical tracheal analgesia with [current comment], 803
- Liver  
function following Fluothane [abstract], 105
- Lungs  
acute pulmonary edema, continuous spinal anesthesia [current comment], 561
- cardio-pulmonary bypass, biochemical changes induced by low flow pump oxygenator during [abstract], 107
- cardiopulmonary bypass for open heart surgery, anesthetic problems in [Keats & others], 501
- thorax compliance, changes, performance of ventilators [Elam & others], 56
- Mareizine: see Cyclozine
- Medical Association of South Africa  
Presidential Address [editorial], 82
- Medical Literature  
Briefs, 120, 295, 424, 570, 690, 811
- Medical Writing  
author's best friend [editorial], 555
- Megimide: see  $\beta$ , $\beta$ -Methylethylglutarimide
- Mepazine (Pacatal)  
pharmacodynamic control of myocardial irritability in dogs by [Corssen & others], 733
- Meperidine  
antagonist—Ritalin [abstract], 101
- Metabolism  
consequences of epinephrine and insulin administered during ether anesthesia [abstract], 104
- Methitural (Neraval)  
hypnosis compared with thiopental [Egbert & others], 656  
 $\beta$ , $\beta$ -Methylethylglutarimide (Megimide) and pentamethylenetetrazol, relative potency [Boyan & others], 321
- Methylphenidate (Ritalin)  
barbiturate and meperidine antagonist [abstract], 101  
effect on thiopental recovery [Gale], 521
- Metrazol: see Pentamethylenetetrazol
- Mexican Society of Anesthesiology  
Seventh Bi-Annual Meeting, notice, 567
- Morphine  
effects on respiratory center [abstract], 95
- Morton, William Thomas Green  
[current comment], 292
- Muscles  
neuromuscular and ganglionic blocking action of thiamine and derivatives [Di Palma & Hitchcock], 762  
oculo-cardiac reflex in eye muscle surgery [Bosomworth & others], 7  
positive inotropic action of cyclopropane on intercostal muscle *in vitro*, and modification by *d*-tubocurarine [Sabawala & Dillon], 473  
preparations, action of volatile anesthetics on [Sabawala & Dillon], 587  
relaxants, effect on evoked central nervous system responses in cat [abstract], 98
- Myocardium  
depression of, and total body oxygen consumption by Fluothane [abstract], 113; [Severinghaus & Cullen], 165

- irritability, pharmacodynamic control by mepazine in dogs [Corssen & others], 733
- Narcotics:** see also under Morphine  
effect of, upon respiration and respiratory response to hypercapnia [Eckenhoff & Helrich], 240  
effects of respiratory center [abstract], 95  
National Fire Protection Association Pamphlet No. 58, notice, 670  
Nausea: see also Vomiting  
postanesthetic cyclizine for [Bonica & others], 532
- Needles**  
blunt-tip, for epidural anesthesia [current comment], 556
- Neraval:** see Methitural
- Nerves**  
axillary brachial plexus block [current comment], 683  
lumbar sympathetic block for obstetrical analgesia [abstract], 98  
neuromuscular and ganglionic blocking action of thiamine and derivatives [Di Palma & Hitchcock], 762  
regional block of great nerves of upper arm [current comment], 281
- Nervous System**  
central, evoked responses, effect of anesthetic agents on [Davis & others], 441  
central, responses in cat, effect of volatile agents and muscle relaxants on [abstract], 98
- New York State Society of Anesthesiologists Twelfth Postgraduate Assembly,** 800
- Nikethamide**  
comparison with newer analeptics [abstract], 115
- Nitrous Oxide**  
analgesia, electrocardiographic studies of tracheo-cardiac reflex during [abstract], 103  
collision broadening effect upon infrared analysis of carbon dioxide during anesthesia [Bergman & others], 19  
effect of, upon respiration and respiratory response to hypercapnia [Eckenhoff & Helrich], 240  
induction, arterial oxygen saturation and respiratory minute volume during [abstract], 94
- Norepinephrine**  
in initiation of ventricular arrhythmias by carbon dioxide inhalation during cyclopropane anesthesia [Price & others], 619
- Noescapine**  
effect on respiratory response to carbon dioxide [Bellville & others], 545
- Obstetrics**  
analgesia, lumbar sympathetic nerve block [abstract], 98
- anesthesia for twin delivery [Little & Friedman], 515
- Oximeter**  
ear, as circulatory monitor [Schotz & others], 386
- Oxygen**  
depression of total body consumption and myocardium by Fluothane [abstract], 113; [Severinghaus & Cullen], 165  
saturation (arterial) and respiratory minute volume, during induction with nitrous oxide [abstract], 94
- Pacatal:** see Mepazine
- Pain**  
intractable, chemical rhizotomy versus cordotomy for [abstract], 102  
"Pecking Order"  
[current comment], 679
- Pentamethylenetetrazol (Metrazol)**  
and  $\beta$ , $\beta$ -methyl ethyl glutarimide, relative potency [Boyan & others], 321
- Pentobarbital Sodium**  
anesthesia, respiration in guinea pigs under [Tabari & Becker], 782  
effect on hemoglobin and hematocrit values in guinea pigs [Tabari & Becker], 541  
tissue distribution and metabolism in rats, effect of diethyl ether on [Baekeland & Greene], 724
- Pentothal:** see Thiopental Sodium
- Pentylenetetrazole (Metrazol)**  
comparison with newer analeptics [abstract], 115
- Perphenazine (Trilafon)**  
control of postoperative vomiting with [Moore & others], 72
- Phenergan:** see Promethazine
- Phenothiazine**  
derivatives, suppression of cyclopropane-pinephrine arrhythmias in dogs by [Winbury & others], 743
- Picrotoxin**  
comparison with newer analeptics [abstract], 115
- Piperidyl Acetate:** see Methylphenidate
- Pontocaine:** see Tetracaine Hydrochloride
- Praeanesthetic Medication**  
effect of, on cardiovascular Force [Malt], 353
- Pregnancy**  
physiological changes during (review) [Marx & Orkin], 258
- Premedication:** see under Anesthesia; Pre-anesthetic Medication; Surgery; also under names of specific drugs
- Procaine**  
use of intracarotid arterial, during cranial arteriography [abstract], 96
- Promethazine (Phenergan)**  
[current comment], 293  
new use [current comment], 402

- studies, with measurements of concentrations in venous blood, fetal cord blood and cerebrospinal fluid [abstract], 93
- Radiation**  
sickness and anesthesia [translation from Russian], 792
- Residencies: see also under Education  
required third year of training in anesthesia? [editorial], 400
- Respiration**  
artificial: see also Resuscitation  
artificial, manual versus mouth-to-mouth methods [abstract], 111  
artificial, mouth-to-mouth [current comment], 414  
cardiac rate and rhythm during steady levels of cyclopropane anesthesia at normal and elevated end-expiratory carbon dioxide tensions [Lurie & others], 457  
cardio-respiratory effects and pharmacologic properties of hydroxydione [abstract], 108  
effects of caffeine, codeine, morphine and combinations of caffeine and narcotics on respiratory center [abstract], 95  
effects of Fluothane [abstract], 106  
effects of Fluothane [Burnap & others], 307  
effects of Fluothane [Hall & Norris], 339  
hypoventilation, carbon dioxide retention during [Earle & others], 153  
minute volume and arterial oxygen saturation, during induction with nitrous oxide [abstract], 94  
performance of ventilators, changes in lung-thorax compliance [Elam & others], 56  
positive-negative pressure ventilation with modified Ayre's T-piece [Eger & Hamilton], 611  
properties of hydroxydione [Montmorency and others], 450  
and respiratory response to hypercapnia, effect of narcotics, thiopental and nitrous oxide upon [Eckenhoff & Helrich], 240  
response to carbon dioxide, effect of noscapine and codeine on [Bellville & others], 545  
responses to carbon dioxide transients during ether and cyclopropane anesthesia [Cobb & others], 359  
responses to changes in arterial blood pressure [editorial], 552  
studies during Fluothane anesthesia [Devine & others], 11  
studies with Arfonad induced hypotension and constant volume ventilation [abstract], 106  
under pentobarbital sodium anesthesia in guinea pigs [Tabari & Becker], 782  
ventilating bronchoscope [current comment], 406  
ventilation and circulation during surgery using volume displacement ventilator [abstract], 100
- Resuscitation: see also Respiration, artificial  
combination resuscitator and aspirator [current comment], 408  
mouth-to-mouth [current comment], 685  
mouth-to-tracheotomy tube [current comment], 802
- Rhizotomy  
chemical, versus cordotomy for intractable pain [abstract], 102
- Ritalin: see Methylphenidate
- Snow, John  
legacy of [Bergman], 595
- Soda Lime: see also under Absorbents, carbon dioxide  
activity and surface area of [Brown], 208
- Species  
differences [editorial], 799
- Spinal Analgesia: see Anesthesia, spinal
- Stages: see under Anesthesia
- Sterilization, Bacterial  
heat, of spinal anesthetic ampuls [Gerlich & others], 386  
of ampuls with ethylene oxide [Hallowell & others], 665
- Succinylcholine  
effect of, on intraocular pressure [abstract], 112  
thoracic compliance in anesthetized subject using [abstract], 116
- Surgery: see also under names of specific organs and procedures  
control of postoperative vomiting with perphenazine [Moore & others], 72  
eye muscle, oculo-cardiac reflex in [Bosomworth & others], 7  
postoperative death after Fluothane [current comment], 562  
preoperative evaluation [editorial], 275  
ventilation and circulation during, using volume displacement ventilator [abstract], 100
- Syntocinon (Oxytocin)  
compatibility with anesthesia in dogs [Feldman & others], 787
- Teaching: see under Education
- Tetracaine Hydrochloride (Pontocaine)  
hypobaric, area of differential block in spinal anesthesia with [Greene], 45
- Thiamine  
and derivatives, neuromuscular and ganglionic blocking action of [Di Palma & Hitchcock], 762
- Thiopental Sodium (Pentothal)  
effect of, upon respiration and respiratory response to hypercapnia [Eckenhoff & Helrich], 240  
hypnosis compared with methitural [Egbert & others], 656  
recovery, effect of methylphenidate on [Gale], 521

- Thorax**  
 compliance in anesthetized subject using cyclopropane, ethylvinyl ether and succinylcholine [abstract], 116  
 -lung compliance changes, performance of ventilators [Elam & others], 56
- Trachea**  
 -cardiac reflex during analgesia with nitrous oxide and relaxants, electrocardiographic studies [abstract], 103  
 tracheostomy tube (modification) [current comment], 405
- Training:** see under Education; Residencies
- Transfusions:** see under Blood
- Trichloroethylene**  
 acute and chronic exposure, tissue levels of [Cohen & others], 188  
 inhalers for [abstract], 109; [Ngai & others], 488
- 1, 1, 1-Trifluoro-2, 2-Bromochlorethane: see Fluothane
- Trilafon:** see Perphenazine
- Trimethaphan Camphorsulfonate**  
 induced hypotension and constant volume ventilation, respiratory studies with [abstract], 106
- d-Tubocurarine**  
 intravenous administration, hypotension and [current comment], 404  
 positive inotropic action of cyclopropane on intercostal muscle *in vitro*, and modification by [Sabawala & Dillon], 473
- Twins**  
 anesthesia for delivery [Little & Friedman], 515
- Vaporization**  
 halothane and ether in Copper Kettle [Feldman & Morris], 650
- Vaporizers**  
 Fluothane, simple and accurate [current comment], 284
- Varices**  
 rupture of esophageal [current comment], 201
- Ventilation:** see under Respiration
- Ventilators**  
 performance, lung-thorax compliance [Elam & others], 56
- Ventricular Fibrillation**  
 incidence of, in experimental hypothermic ventriculotomy, comparison of anesthetics on [Anlyan & others], 213
- Ventriculotomy:** see under Heart, surgery
- Vinamar:** see Ethylvinyl Ether
- Volatile Anesthetics:** see Anesthesia, volatile; under names of specific agents or drugs
- Vomiting**  
 postanesthetic, cyclizine for [Bonica & others], 532  
 postoperative, control with perphenazine [Moore & others], 72
- World Federation of Societies of Anesthesiologists**  
 friendship [editorial], 88
- Xylocaine:** see Lidocaine
